# Supplementary material for: Genome-wide identification and expression analysis of SBP-box gene family reveal their involvement in hormone response and abiotic stresses in Chrysanthemum nankingense
Source: PeerJ. 2022 Oct 27;10:e14241. doi: 10.7717/peerj.14241 (PMC9618261; doi:10.7717/peerj.14241)
Supplement: Supplemental Information 1 — Each data indicates the TPM values of the CnSBP genes in transcriptome. [file peerj-10-14241-s001.xlsx]

## Sheet: Sheet1
File S1 The raw data of TPM values for different tissues of the CnSBP genes in transcriptome.
Gene mane	Bud	Ligulate flower	Tubular flower	Leaf	Stem	Root
CnSBP1	0.211535	0.104411	3.58939	2.27388	2.33666	0
CnSBP2	0.119526	0	0.633798	0	0	0
CnSBP3	0.301265	4.1636	432.023	0.0520081	0.210179	0
CnSBP4	9.74198	1.75209	3.05345	2.51066	0.229303	12.0536
CnSBP5	36.9012	15.8241	16.3018	4.13869	12.1342	24.076
CnSBP6	2.66124	0.256302	0.688363	0.23	0	0
CnSBP7	7.75924	18.9477	38.8548	0.100714	1.49238	0.140943
CnSBP8	50.7196	75.8836	56.8149	25.5837	43.8193	44.3817
CnSBP9	7.78677	20.184	24.6727	6.41211	15.2198	18.5812
CnSBP10	6.31939	3.86673	2.60319	1.40572	2.7327	2.39729
CnSBP11	21.3436	16.5022	9.18074	3.90791	9.14022	8.35358
CnSBP12	0	0	0	0.523046	0	0
CnSBP13	3.43097	3.79339	2.69257	0.236919	0	0.248665
CnSBP14	15.6861	11.2827	9.16413	11.9781	17.9174	21.9045
CnSBP15	9.41548	1.70892	3.72333	1.61986	0.278337	0
CnSBP16	0	0	0.139521	1.41231	0	0
CnSBP17	6.26376	18.2436	22.5637	7.27259	15.4693	15.0075
CnSBP18	35.6405	2.83421	8.50442	6.28089	7.59757	17.8187
CnSBP19	8.79355	0.52	0.364286	2.2372	0	1.82568
CnSBP20	1.14232	1.75917	12.6476	0.0788809	0.15939	0.0551946
CnSBP21	23.1193	15.3173	11.601	76.2737	139.823	0.374857
