# Supplementary material for: Genome-wide identification and expression analysis of SBP-box gene family reveal their involvement in hormone response and abiotic stresses in Chrysanthemum nankingense
Source: PeerJ. 2022 Oct 27;10:e14241. doi: 10.7717/peerj.14241 (PMC9618261; doi:10.7717/peerj.14241)
Supplement: Supplemental Information 2 — Each data indicates the Cq values of the CnSBP genes by qRT-PCR. [file peerj-10-14241-s002.xlsx]

## Sheet: Sheet1
File S2 Raw data for ABA treatment of CnSBP genes
	Actin	CnSBP1							CnSBP2								CnSBP3							CnSBP4								CnSBP5								CnSBP6								CnSBP7
ABA	Cq	Cq	∆CT	-∆∆CT	2-∆∆CT	MEAN	SD		Cq	∆CT	-∆∆CT	2-∆∆CT	MEAN		SD		Cq	∆CT	-∆∆CT	2-∆∆CT	MEAN	SD		Cq	∆CT	-∆∆CT	2-∆∆CT	MEAN	MEAN	SD		Cq	∆CT	-∆∆CT	2-∆∆CT	MEAN	SD	SD		Cq	∆CT	-∆∆CT	2-∆∆CT	MEAN	SD	SD		Cq	∆CT
0	20.65	28.24	7.59	0.05	1.03526		0.0283047		20.65	31.73	11.08	10.9133	-0.17	0.888843	0.0932732		20.65	29.14	8.49	8.54	0.05	0.0778888		20.65	26.24	5.63	5.56267	-0.07	0.952638	0.0527803		20.65	26.42	5.77	5.67667	-0.09	0.939523	0.0656098		20.65	26.54	5.89	5.81667	-0.07	0.952638	0.0355796		20.65	26.67
0	20.88	28.52	7.64	-8.88178e-16	1				20.88	31.79	10.91		0	1			20.88	29.63	8.65		-0.11			20.88	26.52	5.458		0.102	1.07326			20.88	26.59	5.71		-0.03	0.97942			20.88	26.66	5.78		0.04	1.02811			20.88	26.69
0	20.81	28.5	7.69	-0.05	0.965936				20.81	31.56	10.75		0.16	1.11729			20.81	29.29	8.48		0.06			20.81	26.5	5.6		-0.04	0.972655			20.81	26.36	5.55		0.13	1.09429			20.81	26.59	5.78		0.04	1.02811			20.81	26.74
3	21.14	28.99	7.85	-0.21	0.864537	0.903518	0.0901364		31.85	10.71	0.2	1.1487	1.22919		0.0972673		29.91	8.77	-0.23	0.852635	0.882056	0.0501382		27.05	5.91	-0.35	0.784584	0.763274		0.0736359		27.16	6.02	-0.34	0.790041	0.772524	0.0783894			26.99	5.85	-0.03	0.97942	0.908528	0.0738629			27.05	5.91
3	21.34	28.94	7.6	0.04	1.02811				31.8	10.46	0.45	1.36604					29.95	8.61	-0.07	0.952638				27.15	5.81	-0.25	0.840896					27.24	5.9	-0.22	0.858565					27.25	5.91	-0.09	0.939523					27	5.66
3	20.96	28.89	7.93	-0.29	0.817902				31.64	10.68	0.23	1.17283					29.75	8.79	-0.25	0.840896				27.11	6.15	-0.59	0.664343					27.22	6.26	-0.58	0.668964					27.09	6.13	-0.31	0.806642					26.89	5.93
6	21.06	29.05	7.99	-0.35	0.784584	0.862906	0.0882594		31.66	10.6	0.31	1.23971	1.13533		0.0753817		30.45	9.39	-0.85	0.554785	0.625163	0.0707622		27.49	6.43	-0.87	0.547147	0.631587		0.0763282		27	5.94	-0.26	0.835088	0.920886	0.0973429			26.87	5.81	0.01	1.00696	1.06525	0.043042			27.29	6.23
6	21.18	29.11	7.93	-0.29	0.817902				31.95	10.77	0.14	1.10191					30.46	9.28	-0.74	0.598739				27.44	6.26	-0.7	0.615572					27.06	5.88	-0.2	0.870551					26.85	5.67	0.15	1.10957					27.56	6.38
6	21.24	28.9	7.66	-0.02	0.986233				32.06	10.82	0.09	1.06437					30.25	9.01	-0.47	0.721965				27.25	6.01	-0.45	0.732043					26.84	5.6	0.08	1.05702					26.95	5.71	0.11	1.07923					27.4	6.16
12	21.49	29	7.51	0.13	1.09429	1.13868	0.0354253		32.65	11.16	-0.25	0.840896	0.917783		0.057571		30.25	8.76	-0.22	0.858565	1.00098	0.103584		27.15	5.66	-0.1	0.933033	1.0533		0.0850975		25.96	4.47	1.21	2.31338	2.40323	0.115883			26.82	5.33	0.49	1.40444	1.49366	0.133089			26.79	5.3
12	21.93	29.33	7.4	0.24	1.18099				32.94	11.01	-0.1	0.933033					30.33	8.4	0.14	1.10191				27.34	5.41	0.15	1.10957					26.25	4.32	1.36	2.56685					27	5.07	0.75	1.68179					27.29	5.36
12	21.85	29.3	7.45	0.19	1.14076				32.79	10.94	-0.03	0.97942					30.33	8.48	0.06	1.04247				27.25	5.4	0.16	1.11729					26.31	4.46	1.22	2.32947					27.19	5.34	0.48	1.39474					27.25	5.4
24	21.16	27.69	6.53	1.11	2.15846	2.23853	0.134799		31.46	10.3	0.61	1.52626	1.40797		0.0992347		28.77	7.61	0.93	1.90528	1.91006	0.0380259		25.85	4.69	0.87	1.82766	1.67742		0.107777		25.72	4.56	1.12	2.17347	2.20448	0.0548213			25.96	4.8	1.02	2.02792	2.05176	0.0337122			26.66	5.5
24	20.45	27	6.55	1.09	2.12874				31	10.55	0.36	1.28343					28.09	7.64	0.9	1.86607				25.35	4.9	0.66	1.58008					25.02	4.57	1.11	2.15846					25.25	4.8	1.02	2.02792					26.14	5.69
24	21.09	27.45	6.36	1.28	2.42839				31.5	10.41	0.5	1.41421					28.66	7.57	0.97	1.95884				25.95	4.86	0.7	1.6245					25.58	4.49	1.19	2.28153					25.84	4.75	1.07	2.09943					26.54	5.45
48	21.04	27.44	6.4	1.24	2.36199	2.21211	0.119131		31.15	10.11	0.8	1.7411	1.78237		0.130538		28.64	7.6	0.94	1.91853	2.0345	0.0871833		26.14	5.1	0.46	1.37554	1.28507		0.0654976		26.16	5.12	0.56	1.47427	1.43125	0.0412909			26.49	5.45	0.37	1.29235	1.19666	0.0689053			27	5.96
48	20.9	27.49	6.59	1.05	2.07053				31.09	10.19	0.72	1.64718					28.35	7.45	1.09	2.12874				26.17	5.27	0.29	1.22264					26.05	5.15	0.53	1.44393					26.5	5.6	0.22	1.16473					27.05	6.15
48	20.9	27.4	6.5	1.14	2.20381				30.84	9.94	0.97	1.95884					28.4	7.5	1.04	2.05623				26.13	5.23	0.33	1.25701					26.12	5.22	0.46	1.37554					26.54	5.64	0.18	1.13288					26.89	5.99
[truncated: 103 more columns]
