# Supplementary material for: Genome-wide identification and expression analysis of SBP-box gene family reveal their involvement in hormone response and abiotic stresses in Chrysanthemum nankingense
Source: PeerJ. 2022 Oct 27;10:e14241. doi: 10.7717/peerj.14241 (PMC9618261; doi:10.7717/peerj.14241)
Supplement: Supplemental Information 3 — Each data indicates the Cq values of the CnSBP genes by qRT-PCR. [file peerj-10-14241-s003.xlsx]

## Sheet: Sheet1
File S3 Raw data for GA treatment of CnSBP genes
	Actin	CnSBP1							CnSBP2								CnSBP3							CnSBP4								CnSBP5								CnSBP6								CnSBP7
GA	Cq	Cq	∆CT	-∆∆CT	2-∆∆CT	MEAN	SD		Cq	∆CT	-∆∆CT	2-∆∆CT	MEAN	SD	SD		Cq	∆CT	-∆∆CT	2-∆∆CT	MEAN	SD		Cq	∆CT	-∆∆CT	2-∆∆CT	MEAN	MEAN	SD		Cq	∆CT	-∆∆CT	2-∆∆CT	MEAN	SD	SD		Cq	∆CT	-∆∆CT	2-∆∆CT	MEAN	SD	SD		Cq	∆CT
0	20.65	28.24	7.59	0.05	1.03526	1.0004	0.0283047		20.65	31.73	11.08	10.9133	-0.17	0.888843	0.0932732		20.65	29.14	8.49	8.54	0.05	0.0778888		20.65	26.24	5.63	5.56267	-0.07	0.952638	0.0527803		20.65	26.42	5.77	5.67667	-0.09	0.939523	0.0656098		20.65	26.54	5.89	5.81667	-0.07	0.952638	0.0355796		20.65	26.67
0	20.88	28.52	7.64	-8.88178e-16	1				20.88	31.79	10.91		0	1			20.88	29.63	8.65		-0.11			20.88	26.52	5.458		0.102	1.07326			20.88	26.59	5.71		-0.03	0.97942			20.88	26.66	5.78		0.04	1.02811			20.88	26.69
0	20.81	28.5	7.69	-0.05	0.965936				20.81	31.56	10.75		0.16	1.11729			20.81	29.29	8.48		0.06			20.81	26.5	5.6		-0.04	0.972655			20.81	26.36	5.55		0.13	1.09429			20.81	26.59	5.78		0.04	1.02811			20.81	26.74
3	21.22	28.55	7.33	0.31	1.23971	1.27112	0.146425		31.62	10.4	0.51	1.42405	1.42407	0.00805953			29.02	7.8	0.74	1.67018	1.72297	0.185948		26.64	5.42	0.14	1.10191	1.09858	0.0620259			25.33	4.11	1.57	2.96905	3.1771	0.251407			27.74	6.52	-0.7	0.615572	0.730217	0.082553			27.25	6.03
3	21.16	28.65	7.49	0.15	1.10957				31.55	10.39	0.52	1.43396					29.09	7.93	0.61	1.52626				26.69	5.53	0.03	1.02101					25.24	4.08	1.6	3.03143					27.36	6.2	-0.38	0.768438					27.36	6.2
3	21.36	28.45	7.09	0.55	1.46409				31.77	10.41	0.5	1.41421					28.92	7.56	0.98	1.97247				26.69	5.33	0.23	1.17283					25.22	3.86	1.82	3.53081					27.49	6.13	-0.31	0.806642					27.49	6.13
6	21.48	28.44	6.96	0.68	1.60214	1.53406	0.112462		32.16	10.68	0.23	1.17283	1.15147	0.0164275			29.62	8.14	0.4	1.31951	1.34037	0.152641		26.66	5.18	0.38	1.30134	1.266	0.0249898			25.55	4.07	1.61	3.05252	3.24489	0.147378			27.47	5.99	-0.17	0.888843	0.939461	0.129572			27.37	5.89
6	21.73	28.67	6.94	0.7	1.6245				32.44	10.71	0.2	1.1487					29.65	7.92	0.62	1.53688				26.97	5.24	0.32	1.24833					25.64	3.91	1.77	3.41054					27.39	5.66	0.16	1.11729					27.49	5.76
6	21.22	28.4	7.18	0.46	1.37554				31.95	10.73	0.18	1.13288					29.54	8.32	0.22	1.16473				26.46	5.24	0.32	1.24833					25.19	3.97	1.71	3.27161					27.34	6.12	-0.3	0.812252					27.22	6
12	22.04	28.02	5.98	1.66	3.16017	3.17732	0.126697		32.26	10.22	0.69	1.61328	1.63398	0.0803551			29.69	7.65	0.89	1.85318	1.95263	0.105963		27.25	5.21	0.35	1.27456	1.32854	0.128065			26.43	4.39	1.29	2.44528	2.45662	0.00801778			28.04	6	-0.18	0.882703	0.842859	0.0793827			28.04	6
12	22.19	28.09	5.9	1.74	3.34035				32.3	10.11	0.8	1.7411					29.66	7.47	1.07	2.09943				27.16	4.97	0.59	1.50525					26.57	4.38	1.3	2.46229					28.14	5.95	-0.13	0.913831					28.14	5.95
12	21.84	27.88	6.04	1.6	3.03143				32.12	10.28	0.63	1.54756					29.45	7.61	0.93	1.90528				27.13	5.29	0.27	1.20581					26.22	4.38	1.3	2.46229					28.11	6.27	-0.45	0.732043					28.11	6.27
24	21.68	27.69	6.01	1.63	3.09513	3.02872	0.159452		32.24	10.56	0.35	1.27456	1.35692	0.0981436			28.98	7.3	1.24	2.36199	2.2927	0.0526114		27.55	5.87	-0.31	0.806642	0.757679	0.0692436			26.01	4.33	1.35	2.54912	2.67752	0.0937248			27.12	5.44	0.38	1.30134	1.27762	0.0167751			27.85	6.17
24	21.4	27.55	6.15	1.49	2.80889				31.93	10.53	0.38	1.30134					28.78	7.38	1.16	2.23457				27.56	6.16	-0.6	0.659754					25.61	4.21	1.47	2.77022					26.88	5.48	0.34	1.26576					27.8	6.4
24	21.49	27.46	5.97	1.67	3.18215				31.82	10.33	0.58	1.49485					28.84	7.35	1.19	2.28153				27.36	5.87	-0.31	0.806642					25.73	4.24	1.44	2.71321					26.97	5.48	0.34	1.26576					27.94	6.45
48	20.99	27.96	6.97	0.67	1.59107	1.58466	0.0538619		31.1	10.11	0.8	1.7411	1.73353	0.0395127			27.92	6.93	1.61	3.05252	2.95	0.0924712		27.65	6.66	-1.1	0.466516	0.545094	0.0682282			24.86	3.87	1.81	3.50642	3.75707	0.241912			26.42	5.43	0.39	1.31039	1.38334	0.0629865			27.89	6.9
48	21.18	28.22	7.04	0.6	1.51572				31.26	10.08	0.83	1.77769					28.22	7.04	1.5	2.82843				27.64	6.46	-0.9	0.535887					24.83	3.65	2.03	4.08405					26.54	5.36	0.46	1.37554					27.95	6.77
48	21.17	28.09	6.92	0.72	1.64718				31.33	10.16	0.75	1.68179					28.14	6.97	1.57	2.96905				27.39	6.22	-0.66	0.632878					24.97	3.8	1.88	3.68075					26.44	5.27	0.55	1.46409					27.99	6.82
[truncated: 103 more columns]
