# Supplementary material for: Genome-wide identification and expression analysis of SBP-box gene family reveal their involvement in hormone response and abiotic stresses in Chrysanthemum nankingense
Source: PeerJ. 2022 Oct 27;10:e14241. doi: 10.7717/peerj.14241 (PMC9618261; doi:10.7717/peerj.14241)
Supplement: Supplemental Information 4 — Each data indicates the Cq values of the CnSBP genes by qRT-PCR. [file peerj-10-14241-s004.xlsx]

## Sheet: Sheet1
File S4 Raw data for MeJA treatment of CnSBP genes
	Actin	CnSBP1							CnSBP2								CnSBP3							CnSBP4								CnSBP5								CnSBP6								CnSBP7
MeJA	Cq	Cq	∆CT	-∆∆CT	2-∆∆CT	MEAN	SD		Cq	∆CT	-∆∆CT	2-∆∆CT	MEAN	SD	SD		Cq	∆CT	-∆∆CT	2-∆∆CT	MEAN	SD		Cq	∆CT	-∆∆CT	2-∆∆CT	MEAN	MEAN	SD		Cq	∆CT	-∆∆CT	2-∆∆CT	MEAN	SD	SD		Cq	∆CT	-∆∆CT	2-∆∆CT	MEAN	SD	SD		Cq	∆CT
0	20.65	28.24	7.59	0.05	1.03526	1.0004	0.0283047		20.65	31.73	11.08	10.9133	-0.17	0.888843	0.0932732		20.65	29.14	8.49	8.54	0.05	0.0778888		20.65	26.24	5.63	5.56267	-0.07	0.952638	0.0527803		20.65	26.42	5.77	5.67667	-0.09	0.939523	0.0656098		20.65	26.54	5.89	5.81667	-0.07	0.952638	0.0355796		20.65	26.67
0	20.88	28.52	7.64	-8.88178e-16	1				20.88	31.79	10.91		0	1			20.88	29.63	8.65		-0.11			20.88	26.52	5.458		0.102	1.07326			20.88	26.59	5.71		-0.03	0.97942			20.88	26.66	5.78		0.04	1.02811			20.88	26.69
0	20.81	28.5	7.69	-0.05	0.965936				20.81	31.56	10.75		0.16	1.11729			20.81	29.29	8.48		0.06			20.81	26.5	5.6		-0.04	0.972655			20.81	26.36	5.55		0.13	1.09429			20.81	26.59	5.78		0.04	1.02811			20.81	26.74
3	20.96	28.98	8.02	-0.38	0.768438	0.863438	0.0695556		31.45	10.49	0.42	1.33793	1.40943	0.0704389			29.48	8.52	0.02	1.01396	1.11061	0.0902587			26.19	5.23	0.33	1.25701	1.39544	0.103341			27.19	6.23	-0.55	0.68302	0.759952	0.0555595		26.61	5.65	0.17	1.12506	1.27803	0.157571			26.28	5.32
3	21.23	29.04	7.81	-0.17	0.888843				31.55	10.32	0.59	1.50525					29.47	8.24	0.3	1.23114					26.2	4.97	0.59	1.50525					27.21	5.98	-0.3	0.812252				26.47	5.24	0.58	1.49485					26.39	5.16
3	21.12	28.86	7.74	-0.1	0.933033				31.56	10.44	0.47	1.38511					29.54	8.42	0.12	1.08673					26.17	5.05	0.51	1.42405					27.15	6.03	-0.35	0.784584				26.66	5.54	0.28	1.21419					26.25	5.13
6	21.45	29.52	8.07	-0.43	0.742262	0.759712	0.0123394		31.25	9.8	1.11	2.15846	2.03967	0.0979644			29.28	7.83	0.71	1.6358	1.61991	0.0962803			26.66	5.21	0.35	1.27456	1.22045	0.0395779			27.66	6.21	-0.53	0.692555	0.693453	0.0353044		26.65	5.2	0.62	1.53688	1.3923	0.106505			26.65	5.2
6	21.34	29.36	8.02	-0.38	0.768438				31.22	9.88	1.03	2.04202					29.3	7.96	0.58	1.49485					26.66	5.32	0.24	1.18099					27.64	6.3	-0.62	0.650671				26.8	5.46	0.36	1.28343					26.8	5.46
6	21.4	29.42	8.02	-0.38	0.768438				31.37	9.97	0.94	1.91853					29.15	7.75	0.79	1.72907					26.69	5.29	0.27	1.20581					27.52	6.12	-0.44	0.737135				26.78	5.38	0.44	1.3566					26.78	5.38
12	21.95	30.65	8.7	-1.06	0.479632	0.612792	0.109331		32.55	10.6	0.31	1.23971	1.31287	0.0544398			29.44	7.49	1.05	2.07053	2.00061	0.0497513			27.6	5.65	-0.09	0.939523	1.00842	0.0541331			27.88	5.93	-0.25	0.840896	0.91252	0.0737314		26.9	4.95	0.87	1.82766	1.86219	0.0401746			27.44	5.49
12	22.19	30.25	8.06	-0.42	0.747425				32.6456	10.4556	0.4544	1.37021					29.76	7.57	0.97	1.95884					27.65	5.46	0.1	1.07177					27.85	5.66	0.02	1.01396				27.07	4.88	0.94	1.91853					27.37	5.18
12	22.1	30.45	8.35	-0.71	0.61132				32.6	10.5	0.41	1.32869					29.66	7.56	0.98	1.97247					27.64	5.54	0.02	1.01396					27.96	5.86	-0.18	0.882703				27.04	4.94	0.88	1.84038					27.38	5.28
24	20.51	28.41	7.9	-0.26	0.835088	0.864558	0.084368		31.74	11.23	-0.32	0.80107	0.898724	0.103798			29.27	8.76	-0.22	0.858565	1.02883	0.123691			26.88	6.37	-0.81	0.570382	0.656793	0.062655			26.99	6.48	-0.8	0.574349	0.662039	0.0706765		25.59	5.08	0.74	1.67018	1.66713	0.0518656			27.19	6.68
24	20.87	28.54	7.67	-0.03	0.97942				31.72	10.85	0.06	1.04247					29.21	8.34	0.2	1.1487					26.98	6.11	-0.55	0.68302					27.14	6.27	-0.59	0.664343				25.9	5.03	0.79	1.72907					27.1	6.23
24	20.66	28.66	8	-0.36	0.779165				31.8	11.14	-0.23	0.852635					29.09	8.43	0.11	1.07923					26.7	6.04	-0.48	0.716978					26.76	6.1	-0.42	0.747425				25.8	5.14	0.68	1.60214					27.17	6.51
48	20.95	29.36	8.41	-0.77	0.586417	0.600843	0.0507668		32.1046	11.1546	-0.2446	0.84405	0.849583	0.0983074			29.46	8.51	0.03	1.02101	1.00942	0.0163952			27.14	6.19	-0.63	0.646176	0.612059	0.0758093			27.69	6.74	-1.06	0.479632	0.454819	0.0305413		26.27	5.32	0.5	1.41421	1.41096	0.004605			28.15	7.2
48	20.65	29.16	8.51	-0.87	0.547147				32.01	11.36	-0.45	0.732043					29.21	8.56	-0.02	0.986233					27.19	6.54	-0.98	0.50698					27.41	6.76	-1.08	0.473029				25.98	5.33	0.49	1.40444					28	7.35
48	21.04	29.26	8.22	-0.58	0.668964				31.99	10.95	-0.04	0.972655					29.55	8.51	0.03	1.02101					27.15	6.11	-0.55	0.68302					28	6.96	-1.28	0.411796				26.36	5.32	0.5	1.41421					28.12	7.08
[truncated: 103 more columns]
