# Supplementary material for: Genome-wide identification and expression analysis of SBP-box gene family reveal their involvement in hormone response and abiotic stresses in Chrysanthemum nankingense
Source: PeerJ. 2022 Oct 27;10:e14241. doi: 10.7717/peerj.14241 (PMC9618261; doi:10.7717/peerj.14241)
Supplement: Supplemental Information 5 — Each data indicates the Cq values of the CnSBP genes by qRT-PCR. [file peerj-10-14241-s005.xlsx]

## Sheet: Sheet1
File S5 Raw data for SA treatment of CnSBP genes
	Actin	CnSBP1							CnSBP2								CnSBP3							CnSBP4								CnSBP5								CnSBP6								CnSBP7
SA	Cq	Cq	∆CT	-∆∆CT	2-∆∆CT	MEAN	SD		Cq	∆CT	-∆∆CT	2-∆∆CT	MEAN	SD	SD		Cq	∆CT	-∆∆CT	2-∆∆CT	MEAN	SD		Cq	∆CT	-∆∆CT	2-∆∆CT	MEAN	SD	SD		Cq	∆CT	-∆∆CT	2-∆∆CT	MEAN	SD	SD		Cq	∆CT	-∆∆CT	2-∆∆CT	MEAN	SD	SD		Cq	∆CT
0	20.65	28.24	7.59	0.05	1.03526	1.0004	0.0283047		20.65	31.73	11.08	10.9133	-0.17	0.888843	0.0932732		20.65	29.14	8.49	8.54	0.05	0.0778888		20.65	26.24	5.63	5.56267	-0.07	0.952638	0.0527803		20.65	26.42	5.77	5.67667	-0.09	0.939523	0.0656098		20.65	26.54	5.89	5.81667	-0.07	0.952638	0.0355796		20.65	26.67
0	20.88	28.52	7.64	-8.88178e-16	1				20.88	31.79	10.91		0	1			20.88	29.63	8.65		-0.11			20.88	26.52	5.458		0.102	1.07326			20.88	26.59	5.71		-0.03	0.97942			20.88	26.66	5.78		0.04	1.02811			20.88	26.69
0	20.81	28.5	7.69	-0.05	0.965936				20.81	31.56	10.75		0.16	1.11729			20.81	29.29	8.48		0.06			20.81	26.5	5.6		-0.04	0.972655			20.81	26.36	5.55		0.13	1.09429			20.81	26.59	5.78		0.04	1.02811			20.81	26.74
3	21.32	28.69	7.37	0.27	1.20581	1.23127	0.0861922		32.39	11.07	-0.16	0.895025	0.95077	0.0966594			29.12	7.8	0.74	1.67018	1.59263	0.126516		26.9	5.58	-0.02	0.986233	1.04883	0.118076			26.19	4.87	0.81	1.75321	1.80311	0.0469889			26.47	5.15	0.67	1.59107	1.60962	0.0138921			26.47	5.15
3	21.21	28.66	7.45	0.19	1.14076				32.32	11.11	-0.2	0.870551					29.25	8.04	0.5	1.41421				26.85	5.64	-0.08	0.946058					26.05	4.84	0.84	1.79005					26.33	5.12	0.7	1.6245					26.32	5.11
3	21.56	28.77	7.21	0.43	1.34723				32.35	10.79	0.12	1.08673					29.34	7.78	0.76	1.69349				26.84	5.28	0.28	1.21419					26.34	4.78	0.9	1.86607					26.69	5.13	0.69	1.61328					26.65	5.09
6	21.16	28.78	7.62	0.02	1.01396	1.03416	0.132678		32.15	10.99	-0.08	0.946058	0.982275	0.034183			29.43	8.27	0.27	1.20581	1.34658	0.122899		26.9	5.74	-0.18	0.882703	0.911779	0.0635777			26.88	5.72	-0.04	0.972655	1.08747	0.219571			26.7	5.54	0.28	1.21419	1.25752	0.0355794			26.55	5.39
6	21.29	28.66	7.37	0.27	1.20581				32.16	10.87	0.04	1.02811					29.24	7.95	0.59	1.50525				26.85	5.56	-2.66454e-15	1					26.49	5.2	0.48	1.39474					26.73	5.44	0.38	1.30134					26.99	5.7
6	21.16	28.98	7.82	-0.18	0.882703				32.11	10.95	-0.04	0.972655					29.29	8.13	0.41	1.32869				26.95	5.79	-0.23	0.852635					27	5.84	-0.16	0.895025					26.65	5.49	0.33	1.25701					26.85	5.69
12	20.51	28.45	7.94	-0.3	0.812252	0.720908	0.0750176		31.69	11.18	-0.27	0.82932	0.821005	0.0897955			29.15	8.64	-0.1	0.933033	0.966617	0.189926		26.24	5.73	-0.17	0.888843	0.848708	0.0567595			26.39	5.88	-0.2	0.870551	0.831503	0.0975655			26.09	5.58	0.24	1.18099	1.31069	0.160512			26.45	5.94
12	20.87	28.98	8.11	-0.47	0.721965				31.89	11.02	-0.11	0.926588					29.13	8.26	0.28	1.21419				26.6	5.73	-0.17	0.888843					26.66	5.79	-0.11	0.926588					26.41	5.54	0.28	1.21419					26.7	5.83
12	20.25	28.56	8.31	-0.67	0.628507				31.66	11.41	-0.5	0.707107					29.2	8.95	-0.41	0.752623				26.19	5.94	-0.38	0.768438					26.45	6.2	-0.52	0.697372					25.45	5.2	0.62	1.53688					26.12	5.87
24	21.4	29.65	8.25	-0.61	0.655197	0.605321	0.0356098		32.88	11.48	-0.57	0.673617	0.700942	0.0218068			29.54	8.14	0.4	1.31951	1.35611	0.0855407		27.51	6.11	-0.55	0.68302	0.720829	0.0274626			28.12	6.72	-1.04	0.486327	0.661919	0.142391			27.3	5.9	-0.08	0.946058	0.937509	0.0169567			27.61	6.21
24	21.42	29.86	8.44	-0.8	0.574349				32.84	11.42	-0.51	0.702222					29.61	8.19	0.35	1.27456				27.4	5.98	-0.42	0.747425					27.36	5.94	-0.26	0.835088					27.37	5.95	-0.13	0.913831					27.67	6.25
24	21.58	29.99	8.41	-0.77	0.586417				32.95	11.37	-0.46	0.726986					29.56	7.98	0.56	1.47427				27.59	6.01	-0.45	0.732043					27.85	6.27	-0.59	0.664343					27.47	5.89	-0.07	0.952638					27.47	5.89
48	21.26	29.75	8.49	-0.85	0.554785	0.618998	0.0908113		32.87	11.61	-0.7	0.615572	0.680285	0.051757			29.88	8.62	-0.08	0.946058	0.912977	0.0769587		27.01	5.75	-0.19	0.876606	0.800551	0.0872984			27.65	6.39	-0.71	0.61132	0.605951	0.0174814			27.42	6.16	-0.34	0.790041	0.789357	0.0423633			27.42	6.16
48	21.59	29.65	8.06	-0.42	0.747425				33.05	11.46	-0.55	0.68302					30.15	8.56	-0.02	0.986233				27.39	5.8	-0.24	0.846745					27.95	6.36	-0.68	0.624165					27.66	6.07	-0.25	0.840896					27.66	6.07
48	21.36	29.85	8.49	-0.85	0.554785				32.7	11.34	-0.43	0.742262					30.21	8.85	-0.31	0.806642				27.48	6.12	-0.56	0.678302					27.82	6.46	-0.78	0.582367					27.62	6.26	-0.44	0.737135					27.62	6.26
[truncated: 103 more columns]
