# Supplementary material for: Genome-wide identification and expression analysis of SBP-box gene family reveal their involvement in hormone response and abiotic stresses in Chrysanthemum nankingense
Source: PeerJ. 2022 Oct 27;10:e14241. doi: 10.7717/peerj.14241 (PMC9618261; doi:10.7717/peerj.14241)
Supplement: Supplemental Information 6 — Each data indicates the Cq values of the CnSBP genes by qRT-PCR. [file peerj-10-14241-s006.xlsx]

## Sheet: Sheet1
File S6 Raw data for ETH treatment of CnSBP genes
	Actin	CnSBP1							CnSBP2								CnSBP3							CnSBP4								CnSBP5								CnSBP6								CnSBP7
ETH	Cq	Cq	∆CT	-∆∆CT	2-∆∆CT	MEAN	SD		Cq	∆CT	-∆∆CT	2-∆∆CT	MEAN	SD	SD		Cq	∆CT	-∆∆CT	2-∆∆CT	MEAN	SD		Cq	∆CT	-∆∆CT	2-∆∆CT	MEAN	MEAN	SD		Cq	∆CT	-∆∆CT	2-∆∆CT	MEAN	SD	SD		Cq	∆CT	-∆∆CT	2-∆∆CT	MEAN	SD	SD		Cq	∆CT
0	20.65	28.24	7.59	0.05	1.03526	1.0004	0.0283047		20.65	31.73	11.08	10.9133	-0.17	0.888843	0.0932732		20.65	29.14	8.49	8.54	0.05	0.0778888		20.65	26.24	5.63	5.56267	-0.07	0.952638	0.0527803		20.65	26.42	5.77	5.67667	-0.09	0.939523	0.0656098		20.65	26.54	5.89	5.81667	-0.07	0.952638	0.0355796		20.65	26.67
0	20.88	28.52	7.64	-8.88178e-16	1				20.88	31.79	10.91		0	1			20.88	29.63	8.65		-0.11			20.88	26.52	5.458		0.102	1.07326			20.88	26.59	5.71		-0.03	0.97942			20.88	26.66	5.78		0.04	1.02811			20.88	26.69
0	20.81	28.5	7.69	-0.05	0.965936				20.81	31.56	10.75		0.16	1.11729			20.81	29.29	8.48		0.06			20.81	26.5	5.6		-0.04	0.972655			20.81	26.36	5.55		0.13	1.09429			20.81	26.59	5.78		0.04	1.02811			20.81	26.74
3	21.11	28.65	7.54	0.1	1.07177	1.0868	0.0123013		31.5	10.39	0.52	1.43396	1.32869	0.0899541			29.68	8.57	-0.03	0.97942	1.03513	0.0693459		26.46	5.35	0.21	1.15669	1.23937	0.079801			26.45	5.34	0.34	1.26576	1.31818	0.0680032			27.04	5.93	-0.11	0.926588	1.08401	0.124547			27.04	5.93
3	21.26	28.78	7.52	0.12	1.08673				31.75	10.49	0.42	1.33793					29.62	8.36	0.18	1.13288				26.39	5.13	0.43	1.34723					26.44	5.18	0.5	1.41421					26.95	5.69	0.13	1.09429					26.95	5.69
3	21.16	28.66	7.5	0.14	1.10191				31.79	10.63	0.28	1.21419					29.71	8.55	-0.01	0.993092				26.44	5.28	0.28	1.21419					26.49	5.33	0.35	1.27456					26.68	5.52	0.3	1.23114					26.88	5.72
6	21.42	27.95	6.53	1.11	2.15846	2.18996	0.0781016		32.46	11.04	-0.13	0.913831	0.899262	0.0127857			29.82	8.4	0.14	1.10191	1.10789	0.0441776		27.16	5.74	-0.18	0.882703	0.882531	0.0573123			26.27	4.85	0.83	1.77769	1.80003	0.0784183			26.57	5.15	0.67	1.59107	1.39124	0.183107			26.47	5.05
6	21.4	27.84	6.44	1.2	2.2974				32.49	11.09	-0.18	0.882703					29.86	8.46	0.08	1.05702				27.26	5.86	-0.3	0.812252					26.3	4.9	0.78	1.71713					27.02	5.62	0.2	1.1487					26.45	5.05
6	21.59	28.15	6.56	1.08	2.11404				32.65	11.06	-0.15	0.90125					29.91	8.32	0.22	1.16473				27.22	5.63	-0.07	0.952638					26.34	4.75	0.93	1.90528					26.89	5.3	0.52	1.43396					26.55	4.96
12	22.25	28.05	5.8	1.84	3.5801	3.62604	0.178319		32.94	10.69	0.22	1.16473	1.29592	0.094744			30.13	7.88	0.66	1.58008	1.50876	0.142099		28.13	5.88	-0.32	0.80107	0.814345	0.0187744			26.94	4.69	0.99	1.98618	1.89778	0.069985			27.15	4.9	0.92	1.89212	2.00419	0.131394			27.35	5.1
12	22.31	28	5.69	1.95	3.86375				32.75	10.44	0.47	1.38511					30.46	8.15	0.39	1.31039				28.19	5.88	-0.32	0.80107					27.13	4.82	0.86	1.81504					27	4.69	1.13	2.18859					27.22	4.91
12	22.39	28.25	5.86	1.78	3.43426				32.88	10.49	0.42	1.33793					30.22	7.83	0.71	1.6358				28.2	5.81	-0.25	0.840896					27.15	4.76	0.92	1.89212					27.26	4.87	0.95	1.93187					27.22	4.83
24	21.82	28.06	6.24	1.4	2.63902	2.874	0.186465		32.97	11.15	-0.24	0.846745	0.929315	0.0714363			30.01	8.19	0.35	1.27456	1.28661	0.0235395		27.42	5.6	-0.04	0.972655	1.01946	0.0406516			26.92	5.1	0.58	1.49485	1.54218	0.0743637			27.15	5.33	0.49	1.40444	1.4386	0.0624819			27.03	5.21
24	21.99	28	6.01	1.63	3.09513				32.87	10.88	0.03	1.02101					30.19	8.2	0.34	1.26576				27.45	5.46	0.1	1.07177					27.1	5.11	0.57	1.48452					27.2	5.21	0.61	1.52626					27.12	5.13
24	22.02	28.13	6.11	1.53	2.88786				33.05	11.03	-0.12	0.920188					30.16	8.14	0.4	1.31951				27.56	5.54	0.02	1.01396					26.98	4.96	0.72	1.64718					27.37	5.35	0.47	1.38511					27.15	5.13
48	20.86	27.95	7.09	0.55	1.46409	1.75389	0.205553		31.57	10.71	0.2	1.1487	1.2448	0.0739854			30.19	9.33	-0.79	0.578344	0.695507	0.0912966		26.61	5.75	-0.19	0.876606	0.959653	0.0708461			26.11	5.25	0.43	1.34723	1.40188	0.0436136			26.4	5.54	0.28	1.21419	1.25175	0.0365821			26.74	5.88
48	21.26	27.99	6.73	0.91	1.87905				31.76	10.5	0.41	1.32869					30.12	8.86	-0.32	0.80107				26.75	5.49	0.07	1.04972					26.45	5.19	0.49	1.40444					26.77	5.51	0.31	1.23971					26.89	5.63
48	21.14	27.84	6.7	0.94	1.91853				31.72	10.58	0.33	1.25701					30.18	9.04	-0.5	0.707107				26.77	5.63	-0.07	0.952638					26.28	5.14	0.54	1.45397					26.58	5.44	0.38	1.30134					26.86	5.72
[truncated: 103 more columns]
