# Supplementary material for: Genome-wide identification and expression analysis of SBP-box gene family reveal their involvement in hormone response and abiotic stresses in Chrysanthemum nankingense
Source: PeerJ. 2022 Oct 27;10:e14241. doi: 10.7717/peerj.14241 (PMC9618261; doi:10.7717/peerj.14241)
Supplement: Supplemental Information 7 — Each data indicates the Cq values of the CnSBP genes by qRT-PCR. [file peerj-10-14241-s007.xlsx]

## Sheet: Sheet1
File S7 Raw data for salt treatment of CnSBP genes
	Actin	CnSBP1							CnSBP2								CnSBP3							CnSBP4								CnSBP5								CnSBP6								CnSBP7
Salt	Cq	Cq	∆CT	-∆∆CT	2-∆∆CT	MEAN	SD		Cq	∆CT	-∆∆CT	2-∆∆CT	MEAN	SD	SD		Cq	∆CT	-∆∆CT	2-∆∆CT	MEAN	SD	SD	Cq	∆CT	-∆∆CT	2-∆∆CT	MEAN	MEAN	SD		Cq	∆CT	-∆∆CT	2-∆∆CT	MEAN	SD	SD		Cq	∆CT	-∆∆CT	2-∆∆CT	MEAN	SD	SD		Cq	∆CT
0	21.65	28.65	7	0.01	1.00696		0.0566812		21.65	30.73	9.08	9.08667	0.00666667	1.00463	0.0509057		21.65	29.45	7.8	7.83667	0.04	1.02811	0.0183411	21.65	26.16	4.51	4.57667	0.06	1.04247	0.0463528		21.65	26.42	4.77	4.65667	-0.11	0.926588	0.0596797		21.65	26.65	5	4.96	0.82	1.76541	0.0721825		21.65	26.82
0	21.95	28.86	6.91	0.1	1.07177				21.95	31.13	9.18		-0.0933333	0.937354			21.95	29.81	7.86		-0.02	0.986233		21.95	26.62	4.67		-0.1	0.933033			21.95	26.59	4.64		0.02	1.01396			21.95	26.83	4.88		0.94	1.91853			21.95	27.13
0	21.8	28.91	7.11	-0.1	0.933033				21.8	30.8	9		0.0866667	1.06191			21.8	29.65	7.85		-0.01	0.993092		21.8	26.35	4.55		0.02	1.01396			21.8	26.36	4.56		0.1	1.07177			21.8	26.8	5		0.82	1.76541			21.8	26.95
3	21.29	28.65	7.36	-0.35	0.784584	0.842021	0.0432201		30.1	8.81	0.27	1.20581	1.18806	0.100532			30.05	8.76	-0.92	0.528509	0.588771	0.0675018		27.05	5.76	-1.19	0.438303	0.4362	0.0283007			25.21	3.92	0.74	1.67018	1.60925	0.103088			26.84	5.55	-0.59	0.664343	0.622111	0.0321471			27.11	5.82
3	21.49	28.67	7.18	-0.17	0.888843				30.19	8.7	0.38	1.30134					29.88	8.39	-0.55	0.68302				27.15	5.66	-1.09	0.469761					25.6	4.11	0.55	1.46409					27.22	5.73	-0.77	0.586417					27.34	5.85
3	21.22	28.46	7.24	-0.23	0.852635				30.22	9	0.08	1.05702					29.91	8.69	-0.85	0.554785				27.11	5.89	-1.32	0.400535					25.12	3.9	0.76	1.69349					26.88	5.66	-0.7	0.615572					26.85	5.63
6	21.83	29.12	7.29	-0.28	0.823591	0.786933	0.02902		30.45	8.62	0.46	1.37554	1.31388	0.0940476			30.15	8.32	-0.48	0.716978	0.816473	0.0830138		27.49	5.66	-1.09	0.469761	0.598716	0.0965929			25.22	3.39	1.27	2.41162	2.35223	0.0725244			26.95	5.12	-0.16	0.895025	0.857755	0.0442817			26.82	4.99
6	22.19	29.55	7.36	-0.35	0.784584				31.03	8.84	0.24	1.18099					30.15	7.96	-0.12	0.920188				27.44	5.25	-0.68	0.624165					25.59	3.4	1.26	2.39496					27.33	5.14	-0.18	0.882703					27.12	4.93
6	22.17	29.59	7.42	-0.41	0.752623				30.78	8.61	0.47	1.38511					30.31	8.14	-0.3	0.812252				27.25	5.08	-0.51	0.702222					25.66	3.49	1.17	2.25012					27.46	5.29	-0.33	0.795536					27.04	4.87
12	22.24	28.84	6.6	0.41	1.32869	1.28022	0.0820099		30.25	8.01	1.07	2.09943	2.17455	0.068853			29.98	7.74	0.1	1.07177	0.948199	0.0916293		27.15	4.91	-0.34	0.790041	0.664388	0.100757			26.12	3.88	0.78	1.71713	1.57783	0.124855			26.96	4.72	0.24	1.18099	1.03776	0.1026			26.12	3.88
12	22.17	28.75	6.58	0.43	1.34723				30.14	7.97	1.11	2.15846					30.13	7.96	-0.12	0.920188				27.34	5.17	-0.6	0.659754					26.15	3.98	0.68	1.60214					27.15	4.98	-0.02	0.986233					26.15	3.98
12	21.8	28.59	6.79	0.22	1.16473				29.7	7.9	1.18	2.26577					29.87	8.07	-0.23	0.852635				27.25	5.45	-0.88	0.543367					25.96	4.16	0.5	1.41421					26.84	5.04	-0.08	0.946058					25.87	4.07
24	21.82	27.63	5.81	1.2	2.2974	2.27809	0.0908293		30.46	8.64	0.44	1.3566	1.53975	0.139097			29.18	7.36	0.48	1.39474	1.4397	0.084695		25.85	4.03	0.54	1.45397	1.5063	0.118375			26.62	4.8	-0.14	0.907519	0.900107	0.0408814			26.27	4.45	0.51	1.42405	1.30243	0.102713			27.14	5.32
24	21.52	27.42	5.9	1.11	2.15846				29.95	8.43	0.65	1.56917					28.91	7.39	0.45	1.36604				25.35	3.83	0.74	1.67018					26.42	4.9	-0.24	0.846745					26.25	4.73	0.23	1.17283					26.9	5.38
24	21.86	27.62	5.76	1.25	2.37841				30.18	8.32	0.76	1.69349					29.06	7.2	0.64	1.55833				25.95	4.09	0.48	1.39474					26.6	4.74	-0.08	0.946058					26.43	4.57	0.39	1.31039					27.5	5.64
48	21.84	28.44	6.6	0.41	1.32869	1.50178	0.144239		30.22	8.38	0.7	1.6245	1.63615	0.0335439			28.9	7.06	0.78	1.71713	1.91511	0.141839		26.14	4.3	0.27	1.20581	1.27369	0.0733407			27.06	5.22	-0.56	0.678302	0.728151	0.0411851			25.97	4.13	0.83	1.77769	1.62816	0.110116			28.15	6.31
48	22.06	28.49	6.43	0.58	1.49485				30.46	8.4	0.68	1.60214					28.91	6.85	0.99	1.98618				26.17	4.11	0.46	1.37554					27.18	5.12	-0.46	0.726986					26.42	4.36	0.6	1.51572					28.06	6
48	21.87	28.13	6.26	0.75	1.68179				30.2	8.33	0.75	1.68179					28.68	6.81	1.03	2.04202				26.13	4.26	0.31	1.23971					26.89	5.02	-0.36	0.779165					26.16	4.29	0.67	1.59107					28	6.13
[truncated: 103 more columns]
