# Supplementary material for: Genome-wide identification and expression analysis of SBP-box gene family reveal their involvement in hormone response and abiotic stresses in Chrysanthemum nankingense
Source: PeerJ. 2022 Oct 27;10:e14241. doi: 10.7717/peerj.14241 (PMC9618261; doi:10.7717/peerj.14241)
Supplement: Supplemental Information 8 — Each data indicates the Cq values of the CnSBP genes by qRT-PCR. [file peerj-10-14241-s008.xlsx]

## Sheet: Sheet1
File S8 Raw data for drought treatment of CnSBP genes
	Actin	CnSBP1							CnSBP2								CnSBP3							CnSBP4								CnSBP5								CnSBP6								CnSBP7
Drought	Cq	Cq	∆CT	-∆∆CT	2-∆∆CT	MEAN	SD		Cq	∆CT	-∆∆CT	2-∆∆CT	MEAN	SD	SD		Cq	∆CT	-∆∆CT	2-∆∆CT	MEAN	SD	SD	Cq	∆CT	-∆∆CT	2-∆∆CT	MEAN	MEAN	SD		Cq	∆CT	-∆∆CT	2-∆∆CT	MEAN	SD	SD		Cq	∆CT	-∆∆CT	2-∆∆CT	MEAN	SD	SD		Cq	∆CT
0	21.65	28.65	7	0.01	1.00696		0.0566812		21.65	30.73	9.08	9.08667	0.00666667	1.00463	0.0509057		21.65	29.45	7.8	7.83667	0.04	1.02811	0.0183411	21.65	26.16	4.51	4.57667	0.06	1.04247	0.0463528		21.65	26.42	4.77	4.65667	-0.11	0.926588	0.0596797		21.65	26.65	5	4.96	0.82	1.76541	0.0721825		21.65	26.82
0	21.95	28.86	6.91	0.1	1.07177				21.95	31.13	9.18		-0.0933333	0.937354			21.95	29.81	7.86		-0.02	0.986233		21.95	26.62	4.67		-0.1	0.933033			21.95	26.59	4.64		0.02	1.01396			21.95	26.83	4.88		0.94	1.91853			21.95	27.13
0	21.8	28.91	7.11	-0.1	0.933033				21.8	30.8	9		0.0866667	1.06191			21.8	29.65	7.85		-0.01	0.993092		21.8	26.35	4.55		0.02	1.01396			21.8	26.36	4.56		0.1	1.07177			21.8	26.8	5		0.82	1.76541			21.8	26.95
3	22.03	29.59	7.56	-0.55	0.68302	0.619365	0.0694105		31.18	9.15	-0.07	0.952638	0.838946	0.081871			30.46	8.43	-0.59	0.664343	0.629694	0.0699047		26.43	4.4	0.17	1.12506	1.1825	0.0602701			26.33	4.3	0.36	1.28343	1.29545	0.0170092			27.13	5.1	-0.14	0.907519	0.879774	0.0734874			26.26	4.23
3	21.8	29.7456	7.9456	-0.9356	0.522825				31.2	9.4	-0.32	0.80107					30.55	8.75	-0.91	0.532185				26.16	4.36	0.21	1.15669					26.06	4.26	0.4	1.31951					27.12	5.32	-0.36	0.779165					26.13	4.33
3	21.92	29.5465	7.6265	-0.6165	0.652251				31.39	9.47	-0.39	0.76313					30.29	8.37	-0.53	0.692555				26.15	4.23	0.34	1.26576					26.22	4.3	0.36	1.28343					26.95	5.03	-0.07	0.952638					26.1	4.18
6	21.05	28.88	7.83	-0.82	0.566442	0.686667	0.090974		31.16	10.11	-1.03	0.48971	0.570079	0.0639484			29.62	8.57	-0.73	0.602904	0.723596	0.0971896		25.49	4.44	0.13	1.09429	1.18981	0.0899862			25.8	4.75	-0.09	0.939523	0.977858	0.0371365			25.96	4.91	0.05	1.03526	1.2786	0.175718			24.91	3.86
6	21.56	28.9166	7.35657	-0.34657	0.786452				31.44	9.88	-0.8	0.574349					29.65	8.09	-0.25	0.840896				25.74	4.18	0.39	1.31039					26.18	4.62	0.04	1.02811					25.99	4.43	0.53	1.44393					25.56	4
6	21.24	28.75	7.51	-0.5	0.707107				30.95	9.71	-0.63	0.646176					29.54	8.3	-0.46	0.726986				25.59	4.35	0.22	1.16473					25.95	4.71	-0.05	0.965936					25.76	4.52	0.44	1.3566					25.21	3.97
12	21.24	27.69	6.45	0.56	1.47427	1.62139	0.118876		30.26	9.02	0.06	1.04247	1.08029	0.04846			30.22	8.98	-1.14	0.45376	0.509781	0.0903762		26.01	4.77	-0.2	0.870551	0.93278	0.0600601			25.23	3.99	0.67	1.59107	1.63017	0.0795726			26.22	4.98	-0.02	0.986233	1.08416	0.0718696			26.04	4.8
12	21.64	27.95	6.31	0.7	1.6245				30.52	8.88	0.2	1.1487					30.13	8.49	-0.65	0.63728				26.19	4.55	0.02	1.01396					25.66	4.02	0.64	1.55833					26.45	4.81	0.15	1.10957					26.17	4.53
12	21.43	27.62	6.19	0.82	1.76541				30.44	9.01	0.07	1.04972					30.46	9.03	-1.19	0.438303				26.13	4.7	-0.13	0.913831					25.29	3.86	0.8	1.7411					26.18	4.75	0.21	1.15669					26.14	4.71
24	22.09	27.89	5.8	1.21	2.31338	2.19151	0.112488		30.45	8.36	0.72	1.64718	1.67198	0.0781761			29.23	7.14	0.7	1.6245	1.55622	0.0676288		26.12	4.03	0.54	1.45397	1.38915	0.0483421			25.84	3.75	0.91	1.87905	1.86287	0.0639777			27.32	5.23	-0.27	0.82932	0.885719	0.0412003			27.5	5.41
24	21.77	27.75	5.98	1.03	2.04202				30.18	8.41	0.67	1.59107					28.95	7.18	0.66	1.58008				25.92	4.15	0.42	1.33793					25.6	3.83	0.83	1.77769					26.88	5.11	-0.15	0.90125					27.56	5.79
24	21.9	27.76	5.86	1.15	2.21914				30.15	8.25	0.83	1.77769					29.19	7.29	0.55	1.46409				26.01	4.11	0.46	1.37554					25.61	3.71	0.95	1.93187					26.97	5.07	-0.11	0.926588					27.34	5.44
48	22.22	28.39	6.17	0.84	1.79005	1.63968	0.113541		31.04	8.82	0.26	1.19748	1.15988	0.0847982			29.27	7.05	0.79	1.72907	1.82533	0.0831111		26.55	4.33	0.24	1.18099	1.26487	0.0719081			25.9	3.68	0.98	1.97247	1.81923	0.123445			27.42	5.2	-0.24	0.846745	0.823592	0.0552208			28.11	5.89
48	22.03	28.44	6.41	0.6	1.51572				31.05	9.02	0.06	1.04247					28.92	6.89	0.95	1.93187				26.16	4.13	0.44	1.3566					25.83	3.8	0.86	1.81504					27.41	5.38	-0.42	0.747425					28.15	6.12
48	22.13	28.45	6.32	0.69	1.61328				30.9	8.77	0.31	1.23971					29.11	6.98	0.86	1.81504				26.37	4.24	0.33	1.25701					26.05	3.92	0.74	1.67018					27.28	5.15	-0.19	0.876606					28	5.87
[truncated: 103 more columns]
